# Supplementary material for: Effectiveness of inactivated COVID-19 vaccines among older adults in Shanghai: retrospective cohort study
Source: PubMed Central journal article supplement (PMC10086022; doi:10.1038/s41467-023-37673-9), 2023-04-10
Supplement: 41467_2023_37673_MOESM1_ESM.pdf [file 41467_2023_37673_MOESM1_ESM.pdf]

**Table S1 Baseline Demographic Characteristics of Cohort 1 and Cohort 2 (Controls Selection with Sampling Without Replacement)**

|                                                                               | Cohort 1                              |                                     |       | Cohort 2                                  |                                             |       |
|-------------------------------------------------------------------------------|---------------------------------------|-------------------------------------|-------|-------------------------------------------|---------------------------------------------|-------|
|                                                                               | Unvaccinated group<br>(N = 2,903,292) | Vaccinated group<br>(N = 2,903,292) | SMD   | Fully vaccinated group<br>(N = 1,857,411) | Booster vaccinated group<br>(N = 1,847,411) | SMD   |
| Median age [IQR] — years-old                                                  | 67.0 [63.0, 72.0]                     | 67.0 [63.0, 72.0]                   | <0.01 | 67.0 [64.0, 71.0]                         | 67.0 [64.0, 71.0]                           | <0.01 |
| Age group — no. (%)                                                           |                                       |                                     |       |                                           |                                             |       |
| 60 – 69 years-old                                                             | 1,895,552 (65.3)                      | 1,895,552 (65.3)                    | <0.01 | 1,275,493 (69.0)                          | 1,275,493 (69.0)                            | <0.01 |
| 70 – 79 years-old                                                             | 819,954 (28.2)                        | 819,954 (28.2)                      |       | 508,036 (27.5)                            | 508,036 (27.5)                              |       |
| 80 – 89 years-old                                                             | 175,786 (6.1)                         | 175,786 (6.1)                       |       | 61,787 (3.3)                              | 61,787 (3.3)                                |       |
| 90 years-old and above                                                        | 12,000 (0.4)                          | 12,000 (0.4)                        |       | 2,095 (0.1)                               | 2,095 (0.1)                                 |       |
| Sex — no. (%)                                                                 |                                       |                                     |       |                                           |                                             |       |
| Male                                                                          | 1,472,713 (50.7)                      | 1,472,713 (50.7)                    | <0.01 | 920,611 (49.8)                            | 920,611 (49.8)                              | <0.01 |
| Female                                                                        | 1,430,579 (49.3)                      | 1,430,579 (49.3)                    |       | 926,800 (50.2)                            | 926,800 (50.2)                              |       |
| Chronic disease — no. (%)                                                     |                                       |                                     |       |                                           |                                             |       |
| 0                                                                             | 1,669,719 (57.5)                      | 1,669,719 (57.5)                    | <0.01 | 1,160,279 (62.8)                          | 1,160,279 (62.8)                            | <0.01 |
| ≥1                                                                            | 1,233,573 (42.5)                      | 1,233,573 (42.5)                    |       | 687,132 (37.2)                            | 687,132 (37.2)                              |       |
| Cancer                                                                        | 233,159 (8.0)                         | 130,952 (4.5)                       | 0.04  | 73,177 (4.0)                              | 66,913 (3.6)                                | 0.02  |
| Hypertension                                                                  | 981,600 (33.8)                        | 1,041,885 (35.9)                    | 0.04  | 578,198 (31.3)                            | 580,222 (31.4)                              | <0.01 |
| Diabetes                                                                      | 355,445 (12.2)                        | 316,394 (10.9)                      | 0.04  | 174,227 (9.4)                             | 176,418 (9.5)                               | <0.01 |
| Vaccination status — no. (%)                                                  |                                       |                                     |       |                                           |                                             |       |
| Unvaccinated                                                                  | 2,903,292 (100.0)                     | -                                   | -     | -                                         | -                                           | -     |
| Partial vaccination                                                           | -                                     | 475,702 (16.4)                      |       | -                                         | -                                           |       |
| Full vaccination                                                              | -                                     | 1,360,306 (46.9)                    |       | 1,847,411 (100.0)                         | -                                           |       |
| Booster vaccination                                                           | -                                     | 1,067,284 (36.8)                    |       | -                                         | 1,847,411 (100.0)                           |       |
| Time interval between 1 <sup>st</sup> dose and 2 <sup>nd</sup> dose — no. (%) |                                       |                                     |       |                                           |                                             |       |
| Median [IQR] — days                                                           | -                                     | -                                   |       | 23.0 [21.0, 28.0]                         | 23.0 [21.0, 26.0]                           | <0.01 |
| 21 – 56 days                                                                  | -                                     | -                                   |       | 1,832,049 (99.2)                          | 1,832,049 (99.2)                            | <0.01 |
| 57 – 180 days                                                                 | -                                     | -                                   |       | 14,951 (0.8)                              | 14,951 (0.8)                                |       |
| 181 days and above                                                            | -                                     | -                                   |       | 411 (0.0)                                 | 411 (0.0)                                   |       |
| Time interval since completion of 2 <sup>nd</sup> dose — no. (%)              |                                       |                                     |       |                                           |                                             |       |
| Median [IQR] — days                                                           | -                                     | -                                   |       | 202.0 [190.0, 224.0]                      | 212.0 [196.0, 238.0]                        | 0.32  |
| 181 – 270 days                                                                | -                                     | -                                   |       | 1,714,818 (92.8)                          | 1,714,818 (92.8)                            | <0.01 |
| 271 – 360                                                                     | -                                     | -                                   |       | 132,165 (7.2)                             | 132,165 (7.2)                               |       |
| 361 days and above                                                            | -                                     | -                                   |       | 428 (0.0)                                 | 428 (0.0)                                   |       |

SMD: standardized mean difference.

**Table S2 Sensitivity Analyses of Vaccine Effectiveness of Inactivated Covid-19 Vaccine  
against Covid-19 Outcomes**

|                                                                            | Cohort 1                        |                          |                        | Cohort 2                        |                          |                        |
|----------------------------------------------------------------------------|---------------------------------|--------------------------|------------------------|---------------------------------|--------------------------|------------------------|
|                                                                            | Documented SARS-CoV-2 Infection | Severe/critical Covid-19 | Covid-19 related death | Documented SARS-CoV-2 Infection | Severe/critical Covid-19 | Covid-19 related death |
| <b>Negative binomial regression</b>                                        |                                 |                          |                        |                                 |                          |                        |
| Overall                                                                    | 23.8 (22.8, 24.8)               | 86.4 (81.7, 90.0)        | 93.3 (86.9, 96.8)      | 15.8 (14.1, 17.4)               | 57.2 (22.2, 76.9)        | 81.7 (-16.2, 98.2)     |
| Age group                                                                  |                                 |                          |                        |                                 |                          |                        |
| 60 – 69 years-old                                                          | 21.8 (20.5, 23.1)               | 92.3 (86.4, 95.8)        | 96.8 (83.4, 99.6)      | 14.6 (12.7, 16.5)               | 39.6 (-95.3, 82.0)       | 100 (NA)               |
| 70 – 79 years-old                                                          | 25.6 (23.6, 27.5)               | 79.9 (68.9, 87.2)        | 89.6 (73.4, 96.3)      | 19.9 (16.8, 22.8)               | 62.9 (-9.2, 88.0)        | 43.3 (NA)              |
| 80 – 89 years-old                                                          | 38.0 (33.9, 41.8)               | 86.4 (78.3, 91.9)        | 94.2 (77.2, 98.9)      | 4.6 (-7.3, 15.1)                | 70.6 (4.5, 91.6)         | 100 (NA)               |
| 90 years-old and above                                                     | 50.3 (34.8, 62.4)               | 73.5 (26.9, 92.4)        | 92.5 (-52.0, 100.0)    | 3.8 (-68.9, 45.3)               | None*                    | None*                  |
| Sex — no.                                                                  |                                 |                          |                        |                                 |                          |                        |
| Male                                                                       | 22.4 (20.9, 23.9)               | 86.4 (76.3, 92.4)        | 95.7 (83.0, 99.2)      | 19.0 (16.7, 21.1)               | 67.1 (-32.4, 93.0)       | 84.7 (NA)              |
| Female                                                                     | 25.2 (23.7, 26.6)               | 86.5 (80.8, 90.6)        | 91.9 (82.4, 96.6)      | 12.5 (10.1, 14.8)               | 55.1 (11.5, 77.6)        | 78.5 (-195.9, 99.3)    |
| Chronic disease                                                            |                                 |                          |                        |                                 |                          |                        |
| 0                                                                          | 20.6 (19.1, 2.02)               | 88.0 (81.2, 92.5)        | 97.2 (89.5, 99.4)      | 12.2 (10.1, 14.3)               | 57.1 (0.4, 82.3)         | 85.7 (-62.4, 99.4)     |
| ≥1                                                                         | 28.3 (26.8, 29.8)               | 84.9 (78.0, 89.8)        | 87.4 (71.7, 94.8)      | 21.9 (19.3, 24.4)               | 57.7 (5.5, 81.6)         | 70.6 (-661.0, 99.6)    |
| Time interval between 1 <sup>st</sup> dose and 2 <sup>nd</sup> dose (days) |                                 |                          |                        |                                 |                          |                        |
| 21 – 56 days                                                               | -                               | -                        | -                      | 15.8 (14.2, 17.4)               | 55.5 (18.5, 76.0)        | 81.7 (-16.2, 98.2)     |
| 57 – 180 days                                                              | -                               | -                        | -                      | 3.8 (-21.7, 23.9)               | 100 (NA)                 | -                      |
| 181 days and above                                                         | -                               | -                        | -                      | -                               | -                        | -                      |
| Time interval since completion of 2 <sup>nd</sup> dose (days)              |                                 |                          |                        |                                 |                          |                        |
| 181 – 270                                                                  | -                               | -                        | -                      | 15.5 (13.8, 17.2)               | 54.5 (16.4, 75.6)        | 81.8 (-15.9, 98.2)     |
| 271 – 360                                                                  | -                               | -                        | -                      | 18.4 (12.2, 24.2)               | 100 (NA)                 | -                      |
| 361 and above                                                              | -                               | -                        | -                      | 100.0 (13.8, 17.2)              | -                        | -                      |
| <b>Resampling matched controls without replacement</b>                     |                                 |                          |                        |                                 |                          |                        |
| Overall                                                                    | 27.7 (26.7, 28.8)               | 85.8 (81.9, 88.8)        | 91.0 (84.4, 94.8)      | 14.4 (12.7, 16.1)               | 66.1 (43.7, 79.6)        | 80.1 (9.3, 95.6)       |
| Age group                                                                  |                                 |                          |                        |                                 |                          |                        |
| 60 – 69 years-old                                                          | 26.8 (25.4, 28.1)               | 92.7 (87.7, 95.7)        | 97.9 (84.9, 99.7)      | 14.0 (12.0, 15.9)               | 60.5 (-1.9, 84.7)        | None*                  |
| 70 – 79 years-old                                                          | 27.4 (25.5, 29.4)               | 79.0 (70.8, 84.9)        | 83.7 (68.1, 91.7)      | 16.2 (12.8, 19.3)               | 80.1 (52.1, 91.7)        | 83.5 (-36.9, 98.0)     |
| 80 – 89 years-old                                                          | 38.1 (34.1, 41.9)               | 86.1 (76.2, 91.9)        | 95.3 (80.8, 98.9)      | 9.9 (-1.5, 20.0)                | 61.5 (-7.9, 86.3)        | None*                  |
| 90 years-old and above                                                     | 48.3 (31.7, 60.9)               | 77.6 (21.5, 93.6)        | 49.7 (-455.0, 95.4)    | None*                           | None*                    | None*                  |
| Sex                                                                        |                                 |                          |                        |                                 |                          |                        |
| Male                                                                       | 25.2 (23.6, 26.8)               | 85.6 (77.7, 90.7)        | 97.9 (84.9, 99.7)      | 16.5 (14.2, 18.8)               | 50.0 (-46.4, 82.9)       | None*                  |
| Female                                                                     | 30.2 (28.7, 31.6)               | 85.9 (81.1, 89.4)        | 87.9 (78.4, 93.2)      | 12.2 (9.8, 14.6)                | 69.4 (45.4, 82.8)        | 88.9 (12.5, 98.6)      |
| Chronic disease — no.                                                      |                                 |                          |                        |                                 |                          |                        |
| 0                                                                          | 24.9 (23.3, 26.4)               | 88.5 (82.9, 92.3)        | 92.2 (82.2, 96.6)      | 11.8 (9.6, 13.9)                | 76.1 (41.6, 90.2)        | None*                  |
| ≥1                                                                         | 30.8 (29.3, 32.3)               | 83.8 (78.0, 88.0)        | 89.8 (78.8, 95.1)      | 19 (16.3, 21.6)                 | 58.8 (23.2, 77.9)        | 60.5 (-103.7, 92.3)    |
| Time interval between 1 <sup>st</sup> dose and 2 <sup>nd</sup> dose (days) |                                 |                          |                        |                                 |                          |                        |
| 21 – 56 days                                                               | -                               | -                        | -                      | 14.5 (12.8, 16.1)               | 66.1 (43.7, 79.6)        | 80.1 (9.3, 95.6)       |
| 57 – 180 days                                                              | -                               | -                        | -                      | 8.6 (-15.9, 28.0)               | -                        | -                      |
| 181 days and above                                                         | -                               | -                        | -                      | -                               | -                        | -                      |
| Time interval since completion of 2 <sup>nd</sup> dose (days)              |                                 |                          |                        |                                 |                          |                        |
| 181 – 270                                                                  | -                               | -                        | -                      | 14.3 (12.6, 16)                 | 64.9 (41.6, 78.9)        | 80.1 (9.3, 95.6)       |
| 271 – 360                                                                  | -                               | -                        | -                      | 17.4 (8, 25.9)                  | None*                    | -                      |
| 361 and above                                                              | -                               | -                        | -                      | -                               | -                        | -                      |
| <b>Including matched pairs with follow-up time within 7 days</b>           |                                 |                          |                        |                                 |                          |                        |
| 0-7 days                                                                   | 97.8 (91.2, 99.5)               | None*                    | None*                  | 90.4 (80.1, 95.3)               | None*                    | -                      |
| 8-60 days                                                                  | 41.7 (32.8, 49.5)               | 57.2 (-65.5, 88.9)       | None*                  | 25.3 (21.6, 28.8)               | 69.1 (5.2, 89.9)         | None*                  |
| 61-180 days                                                                | 7.6 (0.9, 13.9)                 | None*                    | 90.0 (21.8, 98.7)      | 14.1 (12.3, 15.8)               | 57.6 (30.2, 74.2)        | 74.9 (-18.3, 94.7)     |
| ≥181 days                                                                  | 25.0 (23.9, 26.0)               | 86.2 (82.5, 89.1)        | 93.2 (87.9, 96.2)      | 55.1 (17.4, 75.6)               | -                        | -                      |

\* No evidence of protection based on a negative or very small positive point estimate and wide CIs  
NA: not available

**Table S3 Adjusted Vaccine Effectiveness of Inactivated Covid-19 Vaccine against Covid-19 Outcomes by Vaccine Brand**

|                                    | <b>Cohort 1</b>                        |                                 |                               | <b>Cohort 2</b>                        |                                 |                               |
|------------------------------------|----------------------------------------|---------------------------------|-------------------------------|----------------------------------------|---------------------------------|-------------------------------|
|                                    | <b>Documented SARS-CoV-2 Infection</b> | <b>Severe/critical Covid-19</b> | <b>Covid-19 related death</b> | <b>Documented SARS-CoV-2 Infection</b> | <b>Severe/critical Covid-19</b> | <b>Covid-19 related death</b> |
| <b>By vaccine brand</b>            |                                        |                                 |                               |                                        |                                 |                               |
| Unvaccinated                       | Reference level                        | Reference level                 | Reference level               | -                                      | -                               | -                             |
| One dose Sinovac-CorV              | None*                                  | None*                           | None*                         | -                                      | -                               | -                             |
| One dose BIBP-CorV                 | None*                                  | None*                           | None*                         | -                                      | -                               | -                             |
| One dose WIBP-CorV                 | None*                                  | None*                           | None*                         | -                                      | -                               | -                             |
| One dose other inactive vaccine    | None*                                  | None*                           | None*                         | -                                      | -                               | -                             |
| Two-dose Sinovac-CorV              | None*                                  | 65.5 (50.9, 75.7)               | 80.4 (55.8, 91.3)             | Reference level                        | Reference level                 | Reference level               |
| Two-dose BIBP-CorV                 | None*                                  | 76.4 (61.8, 85.4)               | 82.7 (53.4, 93.6)             | None*                                  | None*                           | None*                         |
| Two-dose WIBP-CorV                 | None*                                  | None*                           | None*                         | 14.3 (0.1, 26.5)                       | None*                           | None*                         |
| Mixed two doses inactive vaccine   | None*                                  | None*                           | None*                         | None*                                  | None*                           | None*                         |
| Three-dose Sinovac                 | 51.7 (50.6, 52.8)                      | 94.9 (91.0, 97.1)               | None*                         | 18.0 (15.8, 20.0)                      | 51.4 (12.0, 73.2)               | None*                         |
| Three-dose BIBP-CorV               | 50.6 (49.3, 51.8)                      | 95.5 (90.9, 97.7)               | 98.2 (86.9, 99.7)             | 16.8 (14.4, 19.1)                      | 62.8 (22.5, 82.2)               | None*                         |
| Three-dose WIBP-CorV               | 66.7 (59.9, 72.3)                      | None*                           | None*                         | 42.2 (31.9, 51.0)                      | None*                           | None*                         |
| Mixed three doses inactive vaccine | 26.6 (20.9, 31.9)                      | None*                           | None*                         | None*                                  | None*                           | None*                         |

\* No evidence of protection based on a negative or very small positive point estimate and wide CIs
